# Supplementary material
Source: HighWire-hosted journal article supplement (http://www.qdcxjkg.com/highwire/filestream/113631/field_highwire_adjunct_files/0/41-6_CME.pdf)
Supplement: 41-6_CME.pdf [file 41-6_CME.pdf]

# CME Credit Application Form (1 CME credit)

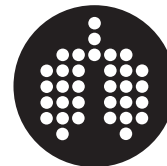

To receive CME credits, read the CME article in this issue, indicate the correct responses to the educational questions and complete the requested information. This form is also available in electronic format at [www.erj.ersjournals.com/current.dtl](http://www.erj.ersjournals.com/current.dtl). To return your application, you can either:

- ▶ use this form and return it completed to ERS Publications Office, 442 Glossop Road, Sheffield, S10 2PX, UK; fax to +44-114-2665064; or e-mail to [info@ersj.org.uk](mailto:info@ersj.org.uk)
- ▶ fill in the online form at [www.erj.ersjournals.com/current.dtl](http://www.erj.ersjournals.com/current.dtl)

Certificates will be e-mailed to the address filled in below. Please allow 4 weeks for processing.

**CME credit applications are now free of charge.**

## Applicant personal details.

ERS Membership No. (if known): ..... Date of Birth (DD/MM/YYYY): .....

Family Name: ..... First Name: .....

Mailing Address: .....

.....

Postal Code: ..... City: ..... Country: .....

Telephone: + ..... E-mail: .....

## Educational questions.

**"Sleep clinical record: an aid to rapid and accurate diagnosis of paediatric sleep disordered breathing"**

### 1. What is the gold standard for the diagnosis of paediatric sleep obstructive apnoea?

According to the America Academy of Sleep Medicine, the gold standard for the diagnosis is unattended polysomnography plus EEG channels and video recordings.  According to the America Academy of Sleep Medicine, the gold standard for the diagnosis is overnight attended polysomnography with only one EEG channels.  According to the America Academy of Sleep Medicine, the gold standard for the diagnosis is overnight attended polysomnography with at least three EEG channels (frontal, temporal and occipital regions).  According to the America Academy of Sleep Medicine, the gold standard for the diagnosis is overnight attended polysomnography with at least three EEG channels (frontal, central and occipital regions).

### 2. What is the sleep clinical record?

A polysomnographic validated questionnaire to screen children with sleep obstructive apnoea based on parental interviews.  A polysomnographic validated record which combines the patient's history and clinical examination, to screen paediatric sleep obstructive apnoea.  A polysomnographic validated questionnaire to diagnose paediatric sleep apnoea.  A polysomnographic validated record to diagnose paediatric sleep apnoea based on signs and symptoms.

### 3. Which of the following is true? The attention deficit hyperactive disorder (ADHD) rating scale:

is included in the sleep clinical record because ADHD is a differential diagnosis of paediatric sleep apnoea.  is included in the sleep clinical record because many children with sleep obstructive apnoea have diurnal neurobehavioral consequences resembling symptoms of ADHD.  is not included in the sleep clinical score but it is an appendix of the sleep clinical record.  it is not included in the sleep clinical record.

### 4. Which of the following is true regarding the use of sleep clinical record as an alternative diagnostic tool for the diagnosis of paediatric sleep obstructive apnoea?

It is a validated tool to screen children to undergo polysomnographic evaluation.  It is a valid alternative to polysomnographic recording.  It is a valid tool together with overnight pulse oximetry to diagnose paediatric sleep apnoea.  It is not a valid tool to screen paediatric obstructive sleep apnoea.
